# Supplementary material for: Immobilization of a Zn4 complex on functionalized layered HUS-7: synthesis, structural investigation and catalytic activity
Source: Royal Society of Chemistry journal article supplement (doi:10.1039/d2nj00669c), 2022-01-01
Supplement: d2nj00669c1.pdf [file d2nj00669c1.pdf]

# Immobilization of Zn<sub>4</sub> complex on functionalized Layered HUS-7: Synthesis, Structural Investigation and Catalytic Activity

Divya Jadav<sup>1</sup>, Pooja Shukla<sup>1</sup>, Rajib Bandyopadhyay<sup>2</sup>, Plaban Jyoti Sarma<sup>3</sup>, Ramesh Chandra Deka<sup>3</sup>, Rajesh Kumar<sup>4</sup>, Sourav Das<sup>1\*</sup>, Nao Tsunoji<sup>4\*</sup>, Mahuya Bandyopadhyay<sup>1\*</sup>

<sup>1</sup>Department of Basic Sciences, Institute of Infrastructure, Technology, Research and Management, IITRAM, Ahmedabad, Gujarat, India

<sup>2</sup>Department of Chemistry, School of Technology, Pandit Deendayal Energy University, Gandhinagar, Gujarat, India

<sup>3</sup>Department of Chemical Sciences, Tezpur University, Tezpur, Assam, India

<sup>4</sup>Graduate School of Advanced Science and Engineering, Hiroshima University, Higashi-Hiroshima 739-8527, Japan

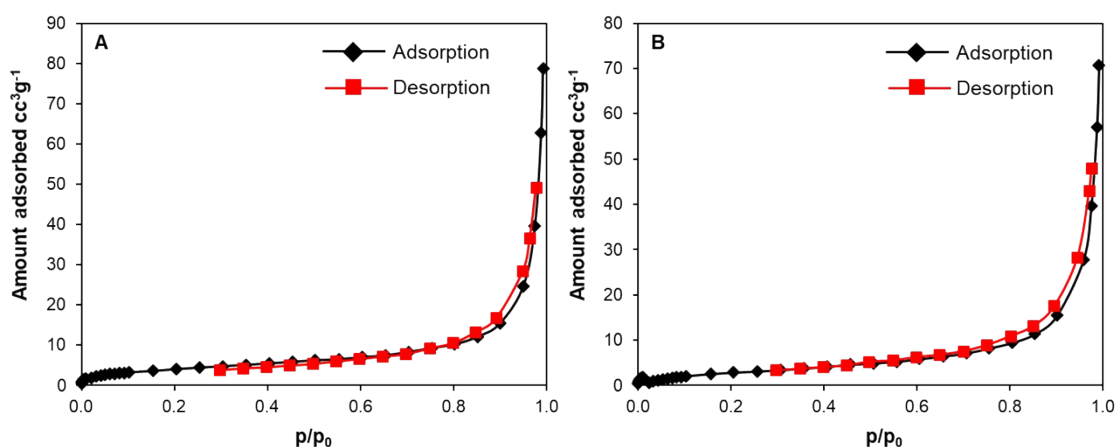

**Figure S1.** Figure S1. N<sub>2</sub> adsorption/desorption isotherm with pore size distribution curve of HUS-7-SO<sub>3</sub>H and HUS-7-SO<sub>3</sub>-Zn<sub>4</sub> samples.

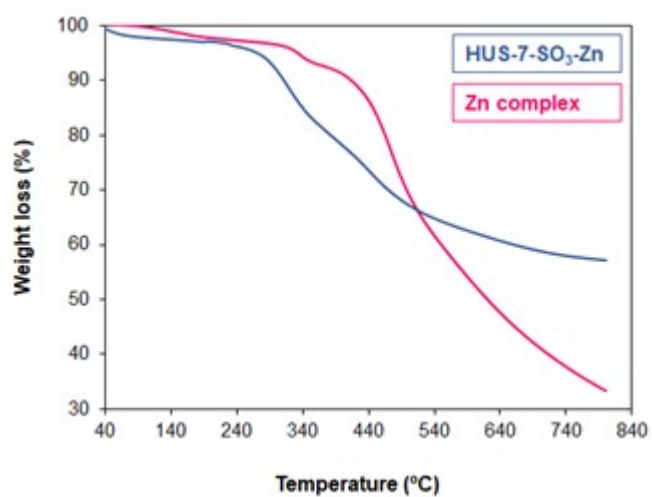

**Figure S2.** TGA profile of HUS-7-SO<sub>3</sub>-Zn<sub>4</sub> and pure Zn<sub>4</sub> complex.

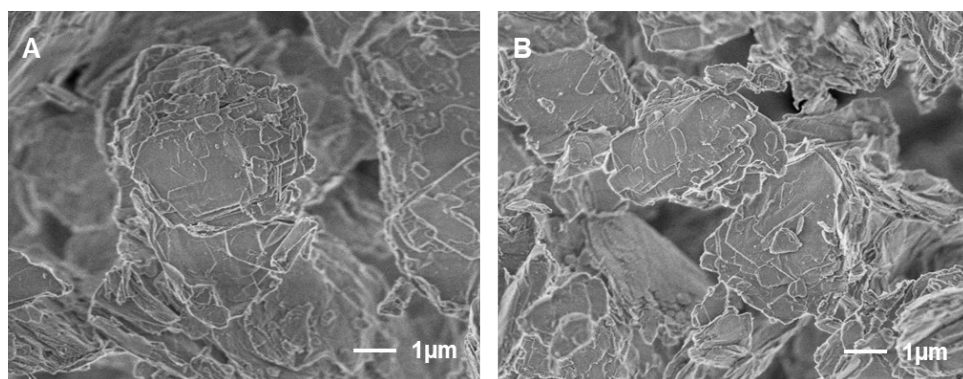

**Figure S3.** SEM image of spent HUS-7-SO<sub>3</sub>-Zn<sub>4</sub> catalyst in (A) morpholine system and (B) piperidine system.
